## Neurodegenerative and functional signatures of the cerebellar cortex in m.3243A>G patients

### Authors:

Roy AM Haast<sup>a,\*</sup>, Irenaeus FM de Coo<sup>b</sup>, Dimo Ivanov<sup>c</sup>, Ali R Khan<sup>a,d,e</sup> and Kâmil Uludağ<sup>f,g,h</sup>

### \*Corresponding author:

E-mail address: [rhaast@uwo.ca](mailto:rhaast@uwo.ca) (Roy AM Haast)

<sup>a</sup> Centre for Functional and Metabolic Mapping, Robarts Research Institute, Western University, 1151 Richmond St. N., London, ON, Canada, N6A 5B7

<sup>b</sup> Department of Toxicogenomics, Unit Clinical Genomics, Maastricht University, MHeNs School for Mental Health and Neuroscience, Maastricht, Netherlands

<sup>c</sup> Department of Cognitive Neuroscience, Faculty of Psychology and Neuroscience, Maastricht University, PO Box 616, 6200 MD, Maastricht, Netherlands

<sup>d</sup> Brain and Mind Institute, Western University, 1151 Richmond St. N., London, ON, Canada, N6A 3K7

<sup>e</sup> Department of Medical Biophysics, Schulich School of Medicine and Dentistry, Western University, 1151 Richmond St. N., London, ON, Canada, N6A 5B7

<sup>f</sup> IBS Center for Neuroscience Imaging Research, Sungkyunkwan University, Seobu-ro, 2066, Jangan-gu, Suwon, South Korea

<sup>g</sup> Department of Biomedical Engineering, N Center, Sungkyunkwan University, Seobu-ro, 2066, Jangan-gu, Suwon, South Korea

<sup>h</sup> Techna Institute and Koerner Scientist in MR Imaging, University Health Network, 100 College St, Toronto, ON, Canada, M5G 1L5

## Abstract

Mutations of the mitochondrial DNA (mtDNA) are an important cause of inherited diseases that can severely affect the tissue's homeostasis and integrity. The m.3243A>G mutation is the most commonly observed across mitochondrial disorders and is linked to multisystemic complications, including cognitive deficits. In line with *in vitro* experiments demonstrating the m.3243A>G's negative impact on neuronal energy production and integrity, m.3243A>G patients show cerebral gray matter tissue changes. However, its impact on the most neuron-dense, and therefore energy-consuming brain structure – the cerebellum – remains elusive. In this work, we used high resolution structural and functional data acquired using 7 Tesla MRI to characterize the neurodegenerative and functional signatures of the cerebellar cortex in m.3243A>G patients. Our results reveal altered tissue integrity within distinct clusters across the cerebellar cortex, apparent by their significantly reduced volume and longitudinal relaxation rate compared to healthy controls, indicating macroscopic atrophy and microstructural pathology. Spatial characterization reveals that these changes occur especially in regions related to the frontoparietal brain network that is involved in information processing and selective attention. In addition, based on resting-state fMRI data, these clusters exhibit reduced functional connectivity to frontal and parietal cortical regions, especially in patients characterized by (i) a severe disease phenotype and (ii) reduced information processing speed and attention control. Combined with our previous work, these results provide crucial insights into the neuropathological changes and a solid base to guide longitudinal studies aimed to track disease progression.

## Keywords

m.3243A>G, cerebellum, function, structure, MRI

## 1. Introduction

Among the many mitochondrial mutations reported<sup>1</sup>, the adenine (A) to guanine (G) transition at base pair 3243 within the MT-TL1 gene encoding tRNA<sup>Leu</sup>(UUR), better known as the m.3243A>G mutation, has been commonly observed across the spectrum of mitochondrial disorders<sup>2,3</sup>. Its clinical expression varies strongly, ranging from patients that are non-symptomatic to patients suffering from episodes of severe stroke-like (SLEs) symptoms<sup>4</sup>. In symptomatic patients, the collection of symptoms are commonly referred to as the ‘mitochondrial encephalopathy lactic acidosis and stroke-like episodes (MELAS)’<sup>5</sup> or ‘maternally inherited diabetes and deafness’<sup>6</sup> syndrome. Despite its relatively high prevalence compared to other mitochondrial mutations, descriptions of neuroradiological changes in m.3243A>G patients are predominantly based on single-case neuroimaging studies and only a limited number of studies have focused on larger cohorts<sup>7-12</sup>.

We have previously reported on the structural changes across the cerebral cortex and subcortical nuclei in a relatively large cohort of twenty-two m.3243A>G patients using high resolution, quantitative 7 Tesla (7T) MRI data<sup>13</sup>. We found significant volume, microstructural and perfusion differences in the brains of patients compared to healthy controls and showed that the magnitude of cerebral gray matter (GM) changes with the percentage affected mitochondria per cell (i.e., ‘mutation load’ or ‘heteroplasmy rate’) and disease severity. Here, specific cortical regions, linked to attentional control (e.g. middle frontal gyrus), the sensorimotor network (e.g. banks of central sulcus) and the default mode network (e.g. precuneus) were shown more prone for alterations in tissue integrity.

Despite the sparse, but growing knowledge on the impact on the cerebral cortex, the neuroradiological correlates of the cerebellum of the m.3243A>G mutation continue to remain understudied. Given the crucial role for mitochondria energy production in neuronal survival<sup>14</sup>, a detailed characterization of cerebellar tissue changes may provide complementary insight in the neuropathological expression of the m.3243A>G mutation and its effect on overall brain’s functioning. The cerebellum features the most strongly convoluted GM across the entire human brain with densely packed neurons that together account for 78 % of the brain’s entire surface area<sup>15</sup>. Traditionally, it is linked to sensorimotor control, ensuring coordinated and timed movements<sup>16</sup>, but its prominence across a broader range of cognitive processes has recently been confirmed through the characterization of its functional topography<sup>17</sup>. Here, distinct regions within the cerebellar GM are involved in a diverse set of motor, cognitive, and social and affective tasks and confirm earlier initial findings<sup>18-20</sup>. As such, impaired cerebellar connectivity due to disease may have profound implications for the integrity of motor and non-motor brain networks<sup>21</sup>.

In this study, we use high resolution 7T MRI data to characterize (i) macroscopic and microstructural changes in the cerebellum of m.3243A>G patients and explore their (ii) spatial correspondence with the cerebellar’s anatomical and functional parcellation, (iii) effect on functional cerebello–cortical connectivity and (iv) correlation with disease severity and cognitive outcome measures. The presented results demonstrate a first and unique description of the neurodegenerative and functional signatures of the cerebellum related to the m.3243A>G mutation.

## 2. Materials & methods

### 2.1. Subject recruitment

Twenty-two m.3243A>G patients and fifteen healthy controls were included in this study after providing written informed consent in accordance with the Declaration of Helsinki. The experimental procedures were approved by the ethics review board of the MUMC+ in Maastricht, The Netherlands. Participants were matched based on age, gender and education (see Table 1). A more detailed description of the in- and exclusion criteria, as well as patient characteristics can be reviewed in an earlier manuscript<sup>13</sup>. Most importantly, disease severity scores were obtained (i) by an experienced clinician (I.F.M.d.C) using the Newcastle Mitochondrial Disease Adult Scale (NMDAS)<sup>22</sup> and (ii) m.3243A>G mutation loads in blood. In addition, cognitive performance scores were collected to correlate with MRI-based findings.

**Table 1 Study population demographics.** Values represent mean ( $\pm$  S.D.) if not stated otherwise.

|                                          | Controls (n=15) | m.3243A>G patients (n=22) | P-value |
|------------------------------------------|-----------------|---------------------------|---------|
| <b>Demographics</b>                      |                 |                           |         |
| Age, yr                                  | 38.40 (14.24)   | 41.23 (10.29)             | 0.487   |
| Sex, % women                             | 73.3            | 81.8                      | 0.538   |
| BMI, kg/m <sup>2</sup>                   | 24.43 (4.24)    | 23.04 (3.59)              | 0.289   |
| Education, scale <sup>a</sup>            | 5.20 (1.21)     | 5.09 (0.92)               | 0.838   |
| <b>Disease-severity scores</b>           |                 |                           |         |
| <i>Mutation load</i>                     |                 |                           |         |
| UECs, %                                  | 0               | 53.14 (26.09)             | -       |
| Blood, %                                 | 0               | 20.23 (11.40)             | -       |
| Barthel index                            | -               | 19.82 (0.83)              | -       |
| NMDAS                                    | -               | 8.50 (4-13)               | -       |
| Number of symptoms                       | 0               | 3.64 (2.46)               | -       |
| <b>Cognitive performance<sup>b</sup></b> |                 |                           |         |
| MMSE                                     | 29.13 (1.30)    | 28.27 (2.47)              | 0.226   |
| LDST, z-score                            | 0 (1.0)         | -1.08 (2.18)              | 0.083   |
| <i>Stroop, z-score</i>                   |                 |                           |         |
| Words only                               | 0 (1.0)         | 0.62 (1.35)               | 0.054   |
| Colours only                             | 0 (1.0)         | 0.95 (1.63)               | 0.081   |
| Words and colours                        | 0 (1.0)         | 1.40 (2.89)               | 0.127   |
| <i>15-WLT, z-score</i>                   |                 |                           |         |
| Total                                    | 0 (1.0)         | -0.38 (1.04)              | 0.282   |
| Recall                                   | 0 (1.0)         | 0.01 (0.99)               | 0.973   |

---

|                    |         |              |       |
|--------------------|---------|--------------|-------|
| <i>Recognition</i> | 0 (1.0) | -0.84 (3.01) | 0.310 |
|--------------------|---------|--------------|-------|

---

<sup>a</sup>Educational scale ranges from 1 (no education) to 8 (university). <sup>b</sup>Significance tested using ANOVA, corrected for age, gender and education. Values represent mean ( $\pm$  S.D.) if not stated otherwise. Abbreviations: BMI = body mass index; UEC = urinary epithelial cells; MMSE = mini-mental state examination.

## 2.2. MRI acquisition

MRI data were acquired using a whole-body 7T magnet (Siemens Medical Systems, Erlangen, Germany) equipped with a 32-channel phased-array head coil (Nova Medical, Wilmington, MA, USA). High resolution (0.7 mm isotropic nominal voxel size) whole-brain quantitative  $T_1$  (i.e., longitudinal relaxation time), and  $B_1^+$  maps (2 mm isotropic nominal voxel size) were obtained using the 3D MP2RAGE<sup>23</sup> and 3D Sa2RAGE<sup>24</sup> sequences, respectively. In addition to the anatomical scans, whole-brain resting-state functional MRI (rs-fMRI) data with an 1.4 mm isotropic nominal voxel size were acquired using a 2D Multi-Band Echo Planar Imaging (2D MB-EPI) sequence to probe functional connectivity between cerebellar and cortical areas. Five additional volumes were acquired with reverse phase encoding to correct the functional data for EPI readout-related geometrical distortions. See Supplementary Table 1 for the relevant sequence parameters. Dielectric pads containing a 25% suspension of calcium titanate in deuterated water were placed proximal to the temporal lobe and cerebellar areas to locally increase the transmit  $B_1^+$  field and to improve its homogeneity across the brain<sup>25</sup>.

## 2.3. MRI data analysis

In brief, anatomical data were used to extract cerebral and cerebellar cortical GM segmentations (and surfaces) for voxel-based morphometry (VBM), while the rs-fMRI data were preprocessed to define cerebello–cortical functional connectivity.

### 2.3.1. Anatomical data pre-processing

MP2RAGE anatomical data were pre-processed as described previously, including a skull stripping workflow optimized for MP2RAGE data using CBS tools<sup>26</sup>, post-hoc  $R_1$  ( $1/T_1$ ) correction for  $B_1^+$  inhomogeneities<sup>27,28</sup> and cortical surface reconstruction and parcellation using FreeSurfer (v6.0)<sup>29</sup>. Native resolution surface meshes (~164k vertices) were downsampled to the '32k\_fs\_LR' surface space using the instructions and transforms (i.e., 'standard mesh atlases') provided by the Human Connectome Project (<https://github.com/Washington-University/HCPpipelines>)<sup>30</sup>. The resulting pre-processed images and surfaces were used as input for subsequent analyses as described below.

### 2.3.2. Voxel-based morphometry workflow

Cerebellar neuroradiological changes in m.3243A>G patients were studied using the SUIT (v3.2, [www.diedrichsenlab.org/imaging/suit.html](http://www.diedrichsenlab.org/imaging/suit.html)) and VBM toolboxes in SPM12 through normalization to a spatially unbiased template of the cerebellum<sup>31,32</sup>. In contrast to SUIT's standard analysis pipeline, which utilizes the segmentation algorithm implemented in SPM12, the cerebellar GM, WM and CSF masks were obtained using the cerebellar segmentation (CERES) tool<sup>33</sup>, to match the previously-used labels<sup>13</sup>. The sum of cerebellar GM and WM maps served as the cerebellar isolation mask and were individually checked and manually corrected using ITK-SNAP (v3.6.0) to exclude non-cerebellar tissue<sup>13,34</sup>.

Diffeomorphic anatomical registration (DARTEL)<sup>35</sup> was employed to normalize the individual subject's cerebellum GM and WM masks to the corresponding probability maps of the SUIT atlas. A detailed description of the underlying workflow can be found in Diedrichsen et al.<sup>36</sup>. The resulting deformation fields were then used to deform the tissue probability and  $R_1$  maps from each individual participant. Finally, transformed GM and WM probability images were multiplied by the relative voxel volumes (i.e., the Jacobian determinants of the deformation field) to correct for volume changes during the spatial normalization step<sup>37</sup> and all output was spatially smoothed with a kernel of 4 mm<sup>3</sup>. As a result, differences in intensities marked approximate GM or WM densities (and thus served as a proxy for tissue volume changes), and  $R_1$  for each voxel. These could then be used to directly examine differences between patients and controls (see section on statistical analyses for further details).

### 2.3.3. Resting-state fMRI analysis

Pre-processing of the rs-fMRI EPI volumes included slice-timing correction (using AFNI's '3dTshift'<sup>38</sup>), followed by estimation of (i) volume-specific motion parameter matrices (FSL's 'mcflirt'<sup>39</sup>); (ii) gradient non-linearity (Human Connectome Project's 'gradient\_unwarp.py'); (iii) EPI readout-related (using the opposite phase encoding images and FSL's 'topup'<sup>40</sup>) distortions maps; and (iv) the transformation to a 1.6 mm<sup>3</sup> MNI template space. To achieve the latter, first, a linear coregistration between the subject's mean rs-fMRI EPI volume and the subject's native skull stripped anatomical volume (i.e., EPI-to-anatomical registration, and its inverse) was calculated using FreeSurfer's boundary-based registration implementation ('bbrgister')<sup>41</sup>. This was followed by computing the subject's native anatomical-to-MNI non-linear transformation warp (and its inverse) using FSL's 'fnirt'<sup>42</sup>. Finally, each slice-timing-corrected rs-fMRI EPI volume was resampled and resliced into the MNI template space using a one-step procedure that included: (i) motion correction, (ii) gradient non-linearity, (iii) readout distortion and (iv) the MNI-space transformation.

Within the CONN functional connectivity toolbox (<https://web.conn-toolbox.org/>)<sup>43</sup>, resampled rs-fMRI data were then denoised using aCompCor (WM and CSF ROIs, 5 components each)<sup>44</sup>, scrubbing (number of identified invalid scans), motion regression (12 regressors: 6 motion parameters + 6 first-order temporal derivatives), temporal band-pass filtering (0.08 – 0.8 Hz), detrended and demeaned. In parallel, left and right hemisphere cortical (i.e., 32k\_fs\_LR) surfaces were transformed to MNI space using the obtained inverse EPI-to-anatomical transformation matrices and Connectome Workbench's 'surface-apply-warpfield' command for projection of the denoised data onto the surface<sup>45</sup>. This allowed generation of HCP-style dense timeseries for first-level analyses.

For the first-level (i.e., region of interest [ROI]-to-ROI) analyses, cerebello-cortical connectivity (i.e., correlation) matrices were computed for each subject. Here, ROIs included the 'seed' ROIs based on the VBM results of the anatomical data as well as predefined cortical ROIs based on the Schaefer ( $N_{\text{regions}}=100$ ) atlas<sup>46</sup>. The Schaefer atlas exploits local gradients in resting-state functional connectivity, while maximizing similarity of rs-fMRI time courses within a parcel. It additionally allows stratification of results based on seven large-scale networks: default-mode (DMN), frontoparietal (FPN), dorsal attention (DAN), ventral attention (VAN), somatosensory (SMN), limbic and visual networks<sup>47</sup>.

## 2.4. Statistical analyses

Group and disease severity effects were explored using the outputs from the volumetric, VBM and rs-fMRI workflows above and the statistical models implemented in the *statsmodels* (v1.12.0), 'Permutation Analysis of Linear Models' (PALM)<sup>48</sup> and 'Network-Based Statistics' (NBS)<sup>49</sup> toolboxes, respectively.

Global GM, WM and lobular volumes (% of estimated total intracranial volume to account for differences in head size between participants) were compared between controls and patients using a one-way (GM and WM separately) or multivariate (across GM lobules) analysis of variance (ANOVA), as well as a function of NMDAS and mutation load using linear regression analysis. Age and sex effects were accounted for by including them in the model as additional regressors.

For the VBM results and to test for between-group differences, voxel-wise comparison were performed for GM density and  $R_1$  maps separately after which joint inference over the two modalities was performed using Non-Parametric Combination (NPC)<sup>50</sup> and  $N=5000$  permutations. Statistical results were corrected for age, gender and estimated total intracranial volume (eTIV). In both cases, statistical testing was restricted to either GM or WM, as earlier results showed that the m.3243A>G genotype mostly affects GM tissue. Here, the explicit masks were obtained by thresholding (at 0.5) the corresponding SUI cerebellar probability maps. Finally, after multiple comparison correction (i.e., across voxels and modalities)<sup>51</sup> using Family-Wise Error (FWE,  $q\text{-FWE} = .05$ ) of the statistical t-maps, corresponding clusters of significant differences were exported for visualization and used as seed ROIs for functional connectivity analyses, respectively.

Differences in ROI-to-ROI functional connectivity – defined by the Pearson's correlation coefficients between a ROI's across-voxels averaged BOLD timeseries and another ROI's BOLD timeseries – between patients and controls, were examined using the NBS statistic, while controlling for age, gender, education and eTIV. Note that the entire connectome (i.e., cortical + cerebellar ROIs) was used at this stage. Multiple regression was used to test for significant correlations of functional connectivity with disease severity and cognitive performance scores across patients only. Bonferroni correction was applied to control for multiple comparisons (i.e.,  $p < .05/N_{\text{significant edges}}$ ).

Finally, summed ROI-based effect size maps (i.e., between groups, as well as those within patients) were decoded into a list of terms to infer mental processes from the observed pattern. To do so, the summed surface-based effect size map was projected back to volume space and smoothed using a gaussian smoothing kernel ( $\sigma = 2$  mm, while ignoring zero-valued voxels) using the '*metric-to-volume-mapping*', and '*volume-smoothing*' functions in Connectome Workbench, respectively. A GC-LDA model, in conjunction with results from 14,371 studies within the Neurosynth database, were then used to extract a set of terms. The resulting term's weight is associated with its relative spatial correspondence with the statistical map's cortical pattern<sup>52,53</sup>.

## 2.5. Data availability

All automatic anatomical and functional data (pre-)processing steps as detailed above have been implemented in a custom and publicly available Snakemake<sup>54</sup> workflow (<https://github.com/royhaast/smk-melas>). Raw and processed patient data cannot be made publicly available due to institutional privacy restrictions.

## 3. Results

Example quantitative  $R_1$  ( $\text{sec}^{-1}$ , left column), cerebellar tissue masks (middle) and density map (a.u., right) for a control subject (top row) and an m.3243A>G patient (bottom row, 24 vs. 38 yrs. old, respectively) are depicted in Figure 1 across a single sagittal slice. As can be observed, larger inter-folial spaces are visible in the  $R_1$  (first column) and segmentation images (middle column) for the patient, as indicated by the dashed red lines, compared to the control subject.

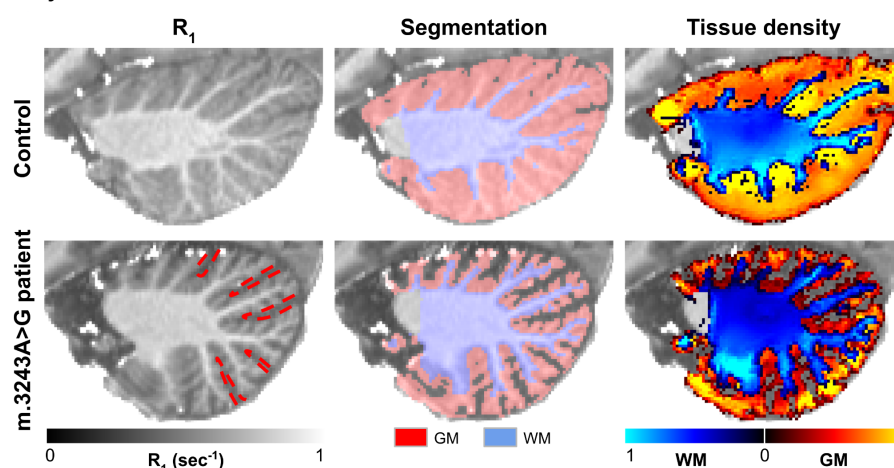

**Figure 1 Example data.** Left to right:  $R_1$ , GM (red) and WM (blue) segmentation masks, and corresponding tissue density maps are shown for a control (top row) and m.3243A>G patient (bottom row). Dashed red lines indicate the inter-folial spacing for the patient.

Average GM volume was significantly lower for the patient group ( $F_{1,68} = 14.96$ ,  $p < .001$ , corrected for age, gender and eTIV), while this main effect was negligible for WM ( $F_{1,68} = 0.733$ ,  $p > .05$ , see red vs. blue dots in top panel in Supplementary Figure 1). More detailed, voxel-wise comparison of GM density and  $R_1$  in Figure 2 were used to better describe the spatial-specificity of volumetric differences between groups. Both modalities were tested individually and then combined for joint inference using Fisher's NPC to extract significant clusters. Note that results are visualized on a flat representation of the cerebellum but that the analyses were performed in volume space. GM density was found consistently higher for control subjects (i.e., in red), while differences in  $R_1$  are more variable but revealing a similar pattern with higher  $R_1$  for the controls. A total of eight clusters of voxels characterized by significant differences in both GM density and  $R_1$  (Fisher combined  $p_{\text{permuted}} < .05$ , delineated by solid back lines) were extracted. The six largest clusters (1-6), characterized by a symmetric distribution across left and right hemispheres (see also 3D rendering), were selected for further characterization using public atlases as well as *in vivo* resting-state fMRI data.



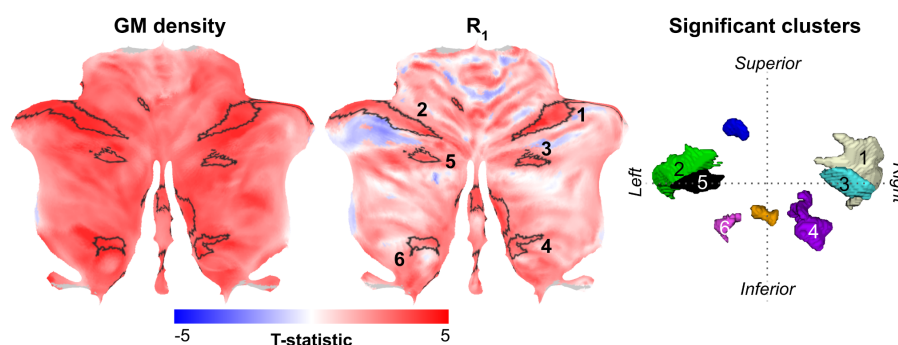

**Figure 2 Voxel-based statistical results.** Flatmap representation of the statistical result when comparing GM density (left) and  $R_1$  (middle) maps between controls and patients. Significant clusters after joint interference are delineated using solid black lines on the flatmaps and represented as 3D meshes (right).

First, to evaluate whether the significant clusters tend to colocalize with predefined anatomical (or functional) parcels, we quantified cluster sizes and their overlap for each cluster–parcel combination (Figure 3, left panel). Here, the dashed black line represents the individual cluster sizes (sorted from largest to smallest) while the stacked bar plot indicates the proportion (%) of each cluster that falls within the respective color-coded atlas region (see middle panel). The two largest clusters (i.e., 1 and 2, covering 1,960 and 1,266  $\text{mm}^3$ , respectively) were equally positioned across lobule VI (48.31 and 40.36 % of their total volume, respectively) and Crus I (51.96 and 59.64 %). Cluster sizes drop strongly from cluster 3 with volumes decreasing from 427 to 166  $\text{mm}^3$ . Taken together (right panel), lobule VI (32.01 %) and Crus I (50.97 %) show the largest overlap with all clusters.

Functionally (see Supplementary Figure 2), clusters 1 (74.36 %) and 2 (72.48 %) strongly colocalize with FPN. Overall, most voxels characterized by a significant difference in GM density and  $R_1$  between groups lie within FPN (52.57 % of total voxels), followed by the DMN (26.21 %), VAN (13.96 %) and SMN (6.66 %), while the overlap with visual, DAN and limbic networks remain negligible (i.e., < 1%)

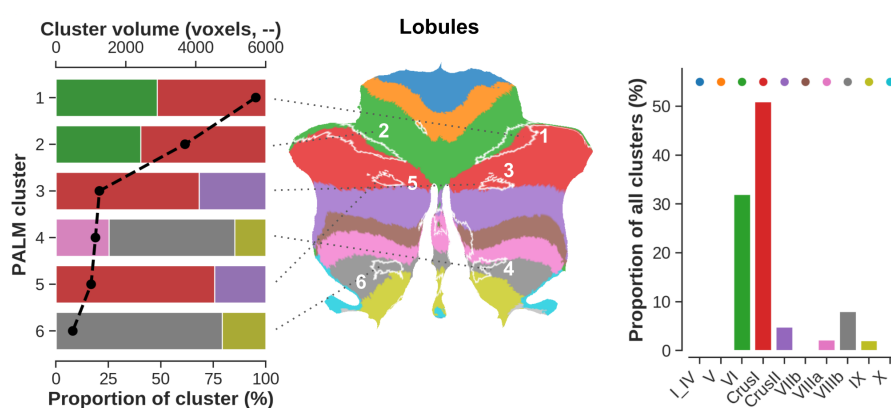

**Figure 3 Spatial distribution of the significant clusters with respect to the cerebellar lobules.** Left to right: stacked bar plot showing statistical (i.e., PALM) clusters (y-axis), ordered from largest at the top (cluster 1) to smallest at the bottom (cluster six, in voxels, top x-axis). Here, the width of each individually-colored bar represents the proportional overlap (bottom x-axis) with the respective lobule. For example, 50 % of cluster one overlaps with Crus I. Middle panel shows a flatmap representation to visualize the localization of each cluster across the cerebellar GM with respect to its lobules. Right panel shows the proportional overlap (y-axis) across all clusters per lobule (x-axis). For example, 50 % of significant voxels fall within Crus I.

Second, to characterize the functional signatures of the affected tissue, connectivity profiles extracted from *in vivo* rs-fMRI data were explored and compared between groups. Example rs-fMRI cortical and cerebellar data for a control subject and m.3243A>G patient for a corresponding brain coactivation timepoint (i.e., DMN) are shown in Figure 4A. Subsequent statistical comparison between groups revealed one significant network across the cortical and cerebellar nodes with 167 edges that were characterized by a significant reduction in connectivity strength for the m.3243A>G patients. Supplementary Figure 3 shows the statistical and corresponding significance matrices. Across all 167 edges, 63 edges (37.72 %, solid black lines in Figure 4B) showed a significantly impacted ( $p < .05$ , NBS corrected, controls > patients) connectivity strength between the cerebellar clusters and a cortical ROI. See Supplementary Figure 4 for the cluster-wise cortical connectivity profiles and significance.

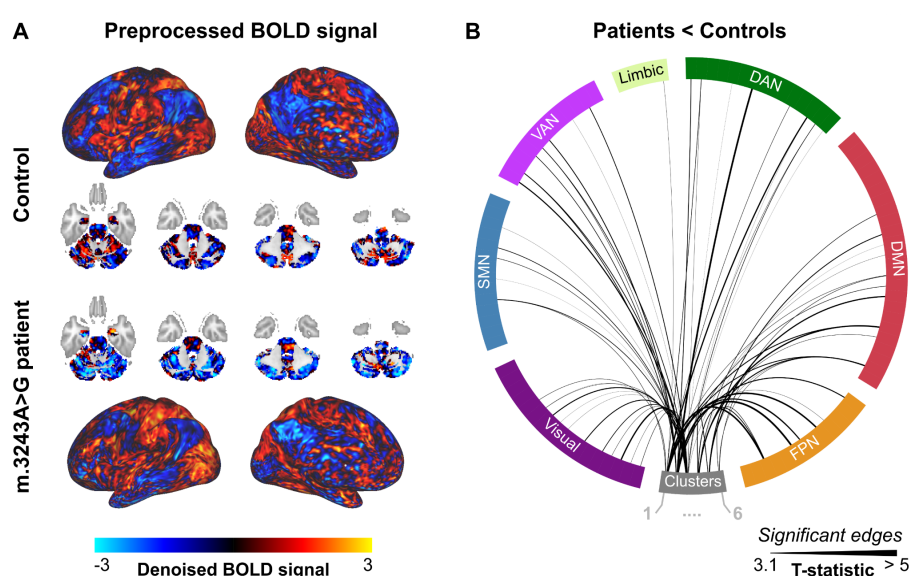

**Figure 4 Characterization of cerebello-cortical functional connectivity.** (A) Visual comparison of the denoised rs-fMRI cortical and cerebellar data for a control subject (top part) and m.3243A>G patient (bottom part) at a corresponding brain coactivation timepoint. (B) Significantly reduced (solid black lines) cerebello-cortical (separated per large-scale brain network) connections in m.3243A>G patients compared to controls.

Taken together, these affected cortical ROIs (delineated using a solid black line in Figures 5A and B) are predominantly positioned along a lateral parietal to frontal band where most prominent group effects are observed in the (especially left hemispheric) frontal regions with cortical ROI's characterized by reduced connectivity with at least two cerebellar clusters (Figure 5A). In parallel, the m.3243A>G mutation most significantly impacts the frontal regions as apparent by the higher T-statistical value (Figure 5B).

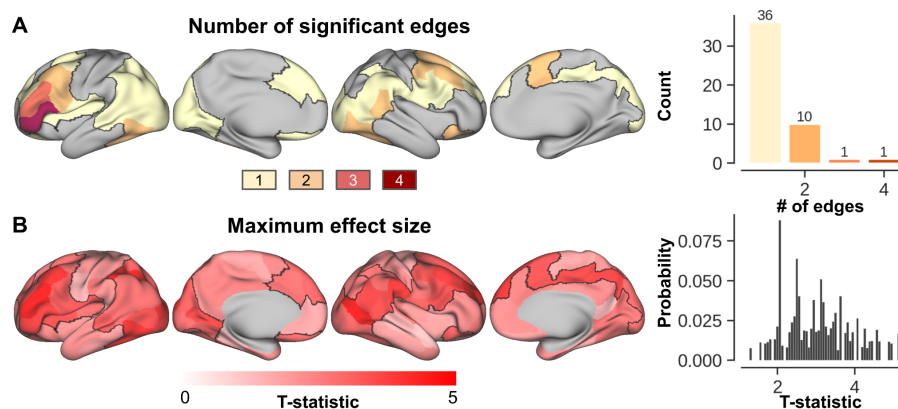

**Figure 5 Spatial characterization of functional connectivity differences.** (A) Surface-wise visualization of the total number of significantly reduced edges (in m.3243A>G patients) per cortical ROI. For example, a cortical ROI will be colored yellow if it shows reduced connectivity to only a single cerebellar cluster, but red if it shows reduced connectivity to four out of the six clusters. ROIs not affected at all are shown in gray. (B) Corresponding maximum effect size per ROI. Briefly, all ROIs are characterized by six T-statistical values, based on the group-wise difference for each of the cerebellar clusters. The maximum is then mapped onto the cortical surface.

Once we identified the edges that were statistically reduced in the patient group, correlation analyses were used to investigate whether the observed effect was stronger in patients characterized by (1) a more severe disease phenotype or (2) worse cognitive performances (Figure 6). Overall, but not exclusively, functional connectivity scales negatively with increasing NMDAS score (i.e., more severe phenotype) across patients. Again, this effect is strongest at the frontal lobe, as well as the insular cortex. For example, a negative correlation ( $p < .001$ ) is visible between NMDAS and cerebellar functional connectivity to a region embedded within the SMN (outlined with a black solid line in upper left surface-based display). Positive correlations are observed across several regions too. However, in contrast to the negative correlations, these are spread asymmetrically across the brain, without a strong spatial preference.

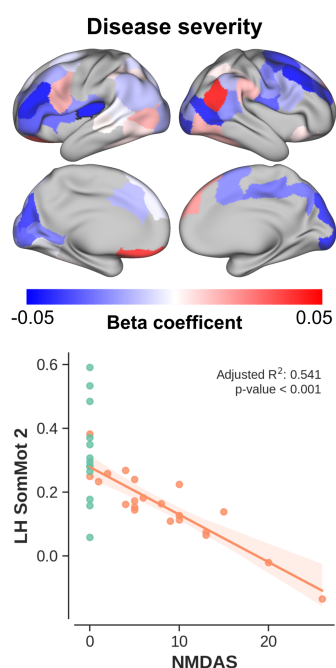

**Figure 6 Disease severity vs connectivity.** Top panel: beta coefficients (i.e., explained change in connectivity strength per unit change in NMDAS) per cortical region mapped onto the cortical surface. Bottom panel: scatter plot showing the change in connectivity (for patients, in orange) as function of NMDAS for the cerebello-cortical pair characterized by the strongest correlation. Control data are shown for comparison (in green).

Functional connectivity decreases with decrease in cognitive performance based on the patients' letter-digit substitution task (LDST, i.e., higher is better, see Figure 7A for the corresponding cortical ROI beta coefficients), Stroop (i.e., higher is worse, Figure 7B) and words-learning task (WLT, higher is better, Figure 7C) test scores. This effect is most consistent across regions for LDST (i.e., information processing speed) and Stroop (attention), but more variable for WLT (memory).

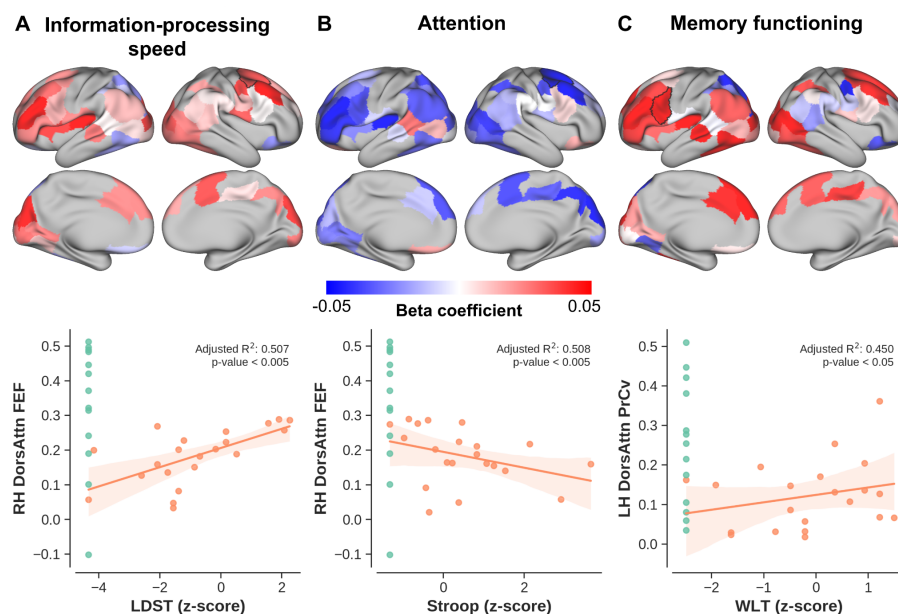

**Figure 7 Cognition vs connectivity.** Similarly to Figure 6 with top panels showing the beta coefficients (i.e., explained change in connectivity strength per unit change in cognitive test score) per cortical region and bottom panels showing scatter plot with the change in connectivity as function of (A) LDST, (B) Stroop and (C) WLT corresponding to information-processing speed, attention and memory functioning, respectively.

Group-wise, disease severity and cognitive performance effect sizes (see Supplementary Figure 5A for their comparison) were summed to identify cortical regions characterized by the most consistent change in their functional connectivity with the cerebellar clusters. Summed effect sizes ranged from 4.31 in parietal regions up to 16.99 in frontal regions (Supplementary Figure 5B). Comparison of the corresponding spatial pattern to the results extracted from 14,371 studies in the Neurosynth database revealed a strong correlation with broad terms such as 'visual' ('correlation weight' = 10097.54, Figure 8B), 'motor' (5161.05) and 'attention' (3906.84) where the term's font size scales with its corresponding weight.

## 4. Discussion

The m.3243A>G genotype is characterized by a large phenotypic spectrum across patients<sup>2,4</sup>. In this work, we employed the most detailed MRI dataset available in a relatively large population of patients carrying the m.3243A>G mutation to define alterations of the spatial pattern of cerebellar macro- and microstructural features, as well as their functional connectivity to cortical areas.

### 4.1. Impact of the m.3243A>G mutation on cerebellar structure

In line with our earlier cerebral cortical findings<sup>13</sup>, the current results show that the m.3243A>G mutation induced (almost exclusively) cerebellar GM tissue changes. Cerebellar GM atrophy worsened with increased severity based on the NMDAS score as well as a higher mutation load measured in both blood (and urine epithelial cells, not shown) similar to that observed for the cerebral cortex. The GM density changes were accompanied by a decrease in  $R_1$ , indicating a reduced concentration of intracortical myelin and iron<sup>55</sup>. In contrast, the WM tissue remained unaffected, independent of disease severity based on both clinical phenotype and mutation load. Together these suggest that the GM tissue's

integrity can become severely impaired in m.3243A>G patients, compared to a group of controls. While this effect appeared to be global (i.e., across the entire GM), statistical testing revealed several ‘hot spots’, or clusters, spread across the cerebellar lobules in a systematic left vs. right fashion for the largest clusters. Spatial characterization of these clusters with respect to a cerebellar anatomical atlas and its lobulation<sup>36</sup> revealed a strong bias towards lobules VI and Crus I, harboring almost 80% of all the significant voxels. In the following, we will contextualize these results using the relevant literature, focusing mostly on the interplay between mitochondrial (dys)functioning and neuronal integrity.

As mentioned in the Introduction, the cerebellum is known for its immensely folded structure that accounts for the majority of the neuronal cell bodies found in the brain. It covers a total area of about 1,590 cm<sup>2</sup> when unfolded, rendering it considerably more dense compared to the roughly 2,000 cm<sup>2</sup> area of the eight times volume of the larger cerebral cortex<sup>15,56</sup>. Consequently, the cerebellar tissue requires a steady and relatively vast supply of nutrients (mostly carbohydrates and fatty acids) to nourish the basal level of activity of its densely packed neurons<sup>57</sup>. The metabolic processes to release the stored energy from these nutrients and generate adenosine triphosphate (ATP), the actual energy substrate, is coregulated by a collection of respiratory chain subunits located within the mitochondria<sup>58</sup>. As such, mitochondrial mutations, like the one central to this work, will lower the mitochondria’s efficiency to produce ATP through oxidative phosphorylation (OXPHOS)<sup>59</sup> and affect the functioning of multiple organs<sup>60</sup>. It has been shown in myoblasts (i.e., embryonic progenitor cells that give rise to muscle cells) from a single MELAS patient that the m.3243A>G mutation leads to impaired translation of all mitochondrial encoded respiratory chain subunits with a decrease in ATP synthesis as result<sup>61</sup>. Recent work has confirmed this observation in human neurons using induced pluripotent stem cell (iPSC) technology<sup>62</sup>. Additionally, the authors observed differences between low and high levels of heteroplasmy iPSC neurons’ anatomy where high levels (71%) of the m.3243A>G mutation appeared to reduce synapses, mitochondria, and dendritic complexity. This is in line with earlier work that linked mitochondrial dysfunction, as well as reduced mitochondrial mass, with altered neuronal dendritic morphology and remodeling *in vitro* and *in vivo*, including direct measurements in the cerebellum<sup>63,64</sup>. Additionally, simulations based on a m.3243A>G biophysical model suggest that cell volume decreases with increasing heteroplasmy to prevent potential energy crises<sup>65</sup>.

Moreover, it has been hypothesized that behavioral effects only appear once the patient’s heteroplasmy level surpasses a certain threshold<sup>1,59,66</sup>. In its simplest form, large-scale deletions that remove multiple genes require lower heteroplasmy of mutated mtDNA, whereas point mutations that affect protein translation, such as the m.3243A>G<sup>67</sup>, require a relatively higher mutation load. The current results show no clear sign of such a threshold. Instead, patients with the lowest mutation load (down to 0 % in blood) were already characterized by cerebellar GM volumes similar to those in the lower regime of observations across healthy controls, and the linearly (and significantly) decreasing GM volume as a function of mutation load is indicative of a gradual rather than threshold effect of the genotype on the cerebellar tissue changes. Besides, defining a robust mutation load threshold is also challenged by the methodological issues related to cellular mechanisms<sup>66</sup> as well as the variation in mutation load across cell types and with age within a patient<sup>68</sup>. It is

important to note that a similar, linear relationship was observed when opposing the volumetric measures to the NMDAS score. Patients with a more severe disease phenotype appear to be characterized by the strongest atrophy. Nevertheless, the heterogeneity and complexity of the m.3243A>G phenotype challenges theoretical understanding of their causation and requires longitudinal tracking of disease progression.

Taken together, the observations discussed above strongly suggest that the m.3243A>G mutation specifically impacts the GM tissue through neuronal morphological changes. Here, our spatial characterization using voxel-wise analyses – that showed a bias towards lobules VI (~30 %) and Crus I (~50 %), located along the superior-posterior portion of the cerebellum – might be used to further deduce the anatomical specificity of these changes towards specific cytoarchitectonic, molecular and/or structural connectivity features<sup>69</sup>.

Cytoarchitecturally, the cerebellar GM is characterized by a distinct (i.e., compared to the neocortex), uniform three-layer architecture composed of the inner granular, outer molecular layer and in between a sheet of Purkinje cells which are solely responsible for directing information away from the cerebellum<sup>70</sup>. Independent of lobulation, ‘transversal zones’ have been identified by leveraging the molecular topography defined by the expression of specific genes across the cerebellum. Interestingly, most significant voxels lie within a central zone characterized by Purkinje cells expressing zebrin II<sup>71</sup>, which is analogous to aldolase C<sup>72</sup>, an important player in glycolytic ATP biosynthesis<sup>73</sup>, posing an indirect link to mitochondrial dynamics<sup>74</sup>. Thus, m.3243A>G-related atrophy might be restricted to certain Purkinje subtypes (e.g., zebrin II+). However, the molecular characterization remains a complex issue and out of the scope of this manuscript. In parallel, the cerebellar cortex can be parcellated based on its anatomical connectivity. In contrast to the transversal zones based on genetic markers, these zones run in a longitudinal fashion, perpendicular to the long axis of the lobules. Most significant voxels lie within zones that appear to receive input from the principal olive nucleus. However, the current results do not show a clear bias towards a specific (set of) zone(s) with the significant clusters spanning from the lateral hemispheres up to the (para)vermis. More coarsely, tracer studies in the macaque monkey show a distinction between prefrontal (mainly lobules Crus I and II) and motor (all other) modules, with anatomical connections running to the respective cortical areas<sup>20,75</sup>. With Crus I being the most affected lobule, especially prefrontal connectivity might be impacted<sup>76</sup>. However, *in vivo* fMRI data is necessary to characterize the functional consequences, which will be discussed next.

#### *4.2. Impact of the m.3243A>G mutation on cerebellar functional connectivity*

It is the growing consensus, supported by electrophysiological mapping in a range of species, that cerebellar’s functional modules are not shaped by its lobules but extend beyond its fissures<sup>69</sup>. Drawing conclusions solely based on comparisons with previously published anatomical parcellations and literature might therefore paint an incomplete picture. As such, we leveraged an openly available functional parcellation, as well as acquired rs-fMRI data to more precisely map out the impact of the observed differences on the brain’s functioning, and potential correlations with the clinical phenotype, based on disease severity and cognitive performance.

Several studies have used the synchronization of rs-fMRI signals between brain regions to identify seven large-scale brain networks<sup>47,77</sup>. From a historic perspective, the function of the cerebellum has been linked to the sensorimotor system. However, the cerebellum appears to play an important role across multiple of the identified large-scale cortical brain networks<sup>78,79</sup>. Our results show great overlap with cerebellar fractions of four of these identified networks but most prominently with FPN (>50 %), followed by DMN (~25 %) and VAN (~15 %). The FPN, also known as the 'central executive network', plays an important role in higher cognitive functions by actively maintaining and manipulating information in working memory, for rule-based problem solving and for decision making in the context of goal-directed behavior<sup>80</sup>. Unlike all other networks, the FPN is disproportionately (i.e., ~two-fold) expanded in the cerebellum compared to the cerebral cortex and might therefore play a relatively important role at the whole-brain scale<sup>78,81</sup>. Damage to the FPN in the cerebellum disturbs a broad range of control functions, including task switching, working memory retrieval, visuo-spatial integration, language, and an overall reduction in intellectual function<sup>82</sup>, collectively known as the cerebellar cognitive affective syndrome<sup>83</sup>. Cognitive deficits are not uncommon in mitochondrial disorders and prevalent in up to a third of m.3243A>G patients<sup>60,68</sup>. While cognitive performance appears to reduce in general, distinct domains, including verbal comprehension, perceptual reasoning, working memory, processing speed, and memory retrieval, were found to be affected in particular<sup>84</sup>. Similarly, the lower LDST and Stroop test scores indicate impaired information processing speed and attention in the current cohort of patients. In both cases, adequate performance thrives on the fluent selection of relevant visual features through neuronal computations in frontal, parietal, and/or limbic areas that are then projected to occipital (i.e., visual) areas<sup>85,86</sup>.

Additionally, we used rs-fMRI data to identify impaired brain networks in our patients. Prior evidence is scarce and only one study has systematically investigated changes in the whole brain's functional topology of m.3243A>G patients<sup>87</sup>. Here, modularity analysis (e.g., network efficiency) revealed that patients had altered intra- or inter-modular connections in default mode, frontoparietal, sensorimotor, visual and cerebellum networks. Our results – using analyses that were particularly focused on the interplay between the affected cerebellar clusters and the rest of the brain – revealed a single network of regions that showed significantly reduced connectivity in the m.3243A>G patients. Spatial characterization of this network shows a strong emphasis on frontal and parietal lobe regions with especially the (left) frontal lobe characterized by impaired connectivity with the cerebellum (e.g., based on the number of significant edges) that intensifies in the more severely affected patients, based on the NMDAS score. This bias towards the frontal lobe, also known as fronto-cerebellar dissociation, has been found to increase the difficulty for a person to select the appropriate response to a stimuli, or to initiate the response<sup>88</sup>. Moreover, focal frontal and parietal lobe lesions resulted in increased errors and slowness in response speed during the Stroop test<sup>89,90</sup>. Similarly, the frontal-parietal cortical network appears to be strongly engaged during the LDST task<sup>91</sup>. In line with these previous studies, our correlational analyses between functional and cognitive profiles show that cerebello-cortical connections characterized by a significant group effect, are weaker in patients with lower LDST and Stroop performances. Additionally, the left frontal lobe is considered the anterior convergence zone of the dorsal (i.e, phonology) and ventral (i.e. semantics) language streams<sup>92</sup>, thus playing an essential role in this dual-stream model. The central role of the

frontal lobe in this model of language processing explains the appearance of terms like 'language', 'words' and 'semantic' when comparing our statistical maps to those included in the NeuroSynth database<sup>53</sup> and could provide novel insights into the cognitive deficits related to the m.3243A>G mutation, and/or mitochondrial diseases in general.

## 5. Conclusions

In summary, the current results indicate that the m.3243A>G mutation significantly impacts the cerebellum with strongest changes observed in most severely affected patients, based on genetic, clinical and cognitive features. The impact of the m.3243A>G mutation ranges from reduced GM tissue integrity to impaired functional connectivity with cortical brain regions. Spatial characterization reveals that these changes occur especially in tissue and regions related to the FPN, crucial for information processing speed and selective attention. Combined with our previous work<sup>13</sup>, it provides crucial insights into the neuropathological changes and a solid base to guide longitudinal studies aimed to track disease progression.

## 6. Acknowledgments

We would like to thank the patients and control participants who agreed to take part in this study. In addition, we thank Rutger JT IJsselstein, Suzanne CEH Sallevelt, Jacobus FA Jansen, Hubert JM Smeets and Elia Formisano for their constructive feedback.

## 7. Funding

This work was supported by Maastricht University, Technology Foundation STW (12724), the Netherlands Organization for Scientific Research (NWO; VIDI grant 452-11-002 to K.U.), Institute for Basic Science, Suwon, Republic of Korea (IBS-R015-D1 to K.U.) and Ride4Kids, Join4Energy and NeMo (to I.F.M.d.C.). The author Roy AM Haast was supported by BrainsCAN postdoctoral fellowships for this work.

## 7. Competing interests

None

## 7. References

1. Taylor RW, Turnbull DM. Mitochondrial DNA mutations in human disease. *Nat Rev Genet*. 2005;6(5):389-402.
2. Goto Y, Nonaka I, Horai S. A mutation in the tRNA(Leu)(UUR) gene associated with the MELAS subgroup of mitochondrial encephalomyopathies. *Nature*. 1990;348(6302):651-653.
3. Manwaring N, Jones MM, Wang JJ, et al. Population prevalence of the MELAS A3243G mutation. *Mitochondrion*. 2007;7(3):230-233.
4. Nesbitt V, Pitceathly RDS, Turnbull DM, et al. The UK MRC Mitochondrial Disease Patient Cohort Study: clinical phenotypes associated with the m.3243A>G mutation--implications for diagnosis and management. *J Neurol Neurosurg Psychiatry*. 2013;84(8):936-938.
5. Hirano M, Ricci E, Koenigsberger MR, et al. Melas: an original case and clinical criteria for diagnosis. *Neuromuscul Disord*. 1992;2(2):125-135.
6. van den Ouweland JM, Lemkes HH, Ruitenbeek W, et al. Mutation in mitochondrial tRNA(Leu)(UUR) gene in



- a large pedigree with maternally transmitted type II diabetes mellitus and deafness. *Nat Genet.* 1992;1(5):368-371.
7. Lindroos MM, Borra RJ, Parkkola R, et al. Cerebral oxygen and glucose metabolism in patients with mitochondrial m.3243A>G mutation. *Brain.* 2009;132(Pt 12):3274-3284.
  8. Tschampa HJ, Urbach H, Greschus S, Kunz WS, Kornblum C. Neuroimaging characteristics in mitochondrial encephalopathies associated with the m.3243A>G MTTL1 mutation. *J Neurol.* 2013;260(4):1071-1080.
  9. Tsujikawa K, Senda J, Yasui K, et al. Distinctive distribution of brain volume reductions in MELAS and mitochondrial DNA A3243G mutation carriers: A voxel-based morphometric study. *Mitochondrion.* 2016;30:229-235.
  10. Rodan LH, Poublanc J, Fisher JA, et al. Cerebral hyperperfusion and decreased cerebrovascular reactivity correlate with neurologic disease severity in MELAS. *Mitochondrion.* 2015;22:66-74.
  11. Kraya T, Neumann L, Paelecke-Habermann Y, et al. Cognitive impairment, clinical severity and MRI changes in MELAS syndrome. *Mitochondrion.* 2019;44:53-57.
  12. Bhatia KD, Krishnan P, Kortman H, Klostranec J, Krings T. Acute Cortical Lesions in MELAS Syndrome: Anatomic Distribution, Symmetry, and Evolution. *AJNR Am J Neuroradiol.* 2020;41(1):167-173.
  13. Haast RAM, Ivanov D, IJsselstein RJT, et al. Anatomic & metabolic brain markers of the m.3243A>G mutation: A multi-parametric 7T MRI study. *Neuroimage Clin.* 2018;18:231-244.
  14. Picard M, McEwen BS. Mitochondria impact brain function and cognition. *Proc Natl Acad Sci U S A.* 2014;111(1):7-8.
  15. Sereno MI, Diedrichsen J, Tachrount M, Testa-Silva G, d'Arceuil H, De Zeeuw C. The human cerebellum has almost 80% of the surface area of the neocortex. *Proc Natl Acad Sci U S A.* 2020;117(32):19538-19543.
  16. Manto M, Bower JM, Conforto AB, et al. Consensus paper: roles of the cerebellum in motor control--the diversity of ideas on cerebellar involvement in movement. *Cerebellum.* 2012;11(2):457-487.
  17. King M, Hernandez-Castillo CR, Poldrack RA, Ivry RB, Diedrichsen J. Functional boundaries in the human cerebellum revealed by a multi-domain task battery. *Nat Neurosci.* 2019;22(8):1371-1378.
  18. Buckner RL. The cerebellum and cognitive function: 25 years of insight from anatomy and neuroimaging. *Neuron.* 2013;80(3):807-815.
  19. Strick PL, Dum RP, Fiez JA. Cerebellum and nonmotor function. *Annu Rev Neurosci.* 2009;32:413-434.
  20. Ramnani N. The primate cortico-cerebellar system: anatomy and function. *Nat Rev Neurosci.* 2006;7(7):511-522.
  21. Reeber SL, Otis TS, Sillitoe RV. New roles for the cerebellum in health and disease. *Front Syst Neurosci.* 2013;7:83.
  22. Schaefer AM, Phoenix C, Elson JL, McFarland R, Chinnery PF, Turnbull DM. Mitochondrial disease in adults: a scale to monitor progression and treatment. *Neurology.* 2006;66(12):1932-1934.
  23. Marques JP, Kober T, Krueger G, van der Zwaag W, Van de Moortele P-F, Gruetter R. MP2RAGE, a self bias-field corrected sequence for improved segmentation and T1-mapping at high field. *Neuroimage.* 2010;49(2):1271-1281.
  24. Eggenschwiler F, Kober T, Magill AW, Gruetter R, Marques JP. SA2RAGE: a new sequence for fast B1+-mapping. *Magn Reson Med.* 2012;67(6):1609-1619.
  25. Teeuwisse WM, Brink WM, Webb AG. Quantitative assessment of the effects of high-permittivity pads in 7

- Tesla MRI of the brain. *Magn Reson Med*. 2012;67(5):1285-1293.
26. Bazin P-L, Weiss M, Dinse J, Schäfer A, Trampel R, Turner R. A computational framework for ultra-high resolution cortical segmentation at 7Tesla. *Neuroimage*. 2014;93 Pt 2:201-209.
  27. Marques JP, Gruetter R. New developments and applications of the MP2RAGE sequence--focusing the contrast and high spatial resolution R1 mapping. *PLoS One*. 2013;8(7):e69294.
  28. Haast RAM, Ivanov D, Uludağ K. The impact of B1+ correction on MP2RAGE cortical T1 and apparent cortical thickness at 7T. *Hum Brain Mapp*. 2018;39(6):2412-2425.
  29. Fischl B. FreeSurfer. *Neuroimage*. 2012;62(2):774-781.
  30. Glasser MF, Sotiropoulos SN, Wilson JA, et al. The minimal preprocessing pipelines for the Human Connectome Project. *Neuroimage*. 2013;80:105-124.
  31. Diedrichsen J. A spatially unbiased atlas template of the human cerebellum. *Neuroimage*. 2006;33(1):127-138.
  32. Ashburner J, Friston KJ. Voxel-based morphometry--the methods. *Neuroimage*. 2000;11(6 Pt 1):805-821.
  33. Romero JE, Coupé P, Giraud R, et al. CERES: A new cerebellum lobule segmentation method. *Neuroimage*. 2017;147:916-924.
  34. Yushkevich PA, Piven J, Hazlett HC, et al. User-guided 3D active contour segmentation of anatomical structures: significantly improved efficiency and reliability. *Neuroimage*. 2006;31(3):1116-1128.
  35. Ashburner J. A fast diffeomorphic image registration algorithm. *Neuroimage*. 2007;38(1):95-113.
  36. Diedrichsen J, Balsters JH, Flavell J, Cussans E, Ramnani N. A probabilistic MR atlas of the human cerebellum. *Neuroimage*. 2009;46(1):39-46.
  37. Good CD, Johnsrude IS, Ashburner J, Henson RN, Friston KJ, Frackowiak RS. A voxel-based morphometric study of ageing in 465 normal adult human brains. *Neuroimage*. 2001;14(1 Pt 1):21-36.
  38. Cox RW. AFNI: software for analysis and visualization of functional magnetic resonance neuroimages. *Comput Biomed Res*. 1996;29(3):162-173.
  39. Jenkinson M, Bannister P, Brady M, Smith S. Improved optimization for the robust and accurate linear registration and motion correction of brain images. *Neuroimage*. 2002;17(2):825-841.
  40. Andersson JLR, Skare S, Ashburner J. How to correct susceptibility distortions in spin-echo echo-planar images: application to diffusion tensor imaging. *Neuroimage*. 2003;20(2):870-888.
  41. Greve DN, Fischl B. Accurate and robust brain image alignment using boundary-based registration. *Neuroimage*. 2009;48(1):63-72.
  42. Jenkinson M, Beckmann CF, Behrens TEJ, Woolrich MW, Smith SM. FSL. *Neuroimage*. 2012;62(2):782-790.
  43. Whitfield-Gabrieli S, Nieto-Castanon A. Conn: a functional connectivity toolbox for correlated and anticorrelated brain networks. *Brain Connect*. 2012;2(3):125-141.
  44. Behzadi Y, Restom K, Liu J, Liu TT. A component based noise correction method (CompCor) for BOLD and perfusion based fMRI. *Neuroimage*. 2007;37(1):90-101.
  45. Marcus DS, Harwell J, Olsen T, et al. Informatics and data mining tools and strategies for the human connectome project. *Front Neuroinform*. 2011;5:4.
  46. Schaefer A, Kong R, Gordon EM, et al. Local-Global Parcellation of the Human Cerebral Cortex from Intrinsic Functional Connectivity MRI. *Cereb Cortex*. 2018;28(9):3095-3114.

47. Yeo BTT, Krienen FM, Sepulcre J, et al. The organization of the human cerebral cortex estimated by intrinsic functional connectivity. *J Neurophysiol.* 2011;106(3):1125-1165.
48. Winkler AM, Ridgway GR, Webster MA, Smith SM, Nichols TE. Permutation inference for the general linear model. *Neuroimage.* 2014;92:381-397.
49. Zalesky A, Fornito A, Bullmore ET. Network-based statistic: identifying differences in brain networks. *Neuroimage.* 2010;53(4):1197-1207.
50. Winkler AM, Webster MA, Brooks JC, Tracey I, Smith SM, Nichols TE. Non-parametric combination and related permutation tests for neuroimaging. *Hum Brain Mapp.* 2016;37(4):1486-1511.
51. Alberton BAV, Nichols TE, Gamba HR, Winkler AM. Multiple testing correction over contrasts for brain imaging. *Neuroimage.* 2020;216:116760.
52. Rubin TN, Koyejo O, Gorgolewski KJ, Jones MN, Poldrack RA, Yarkoni T. Decoding brain activity using a large-scale probabilistic functional-anatomical atlas of human cognition. *PLoS Comput Biol.* 2017;13(10):e1005649.
53. Yarkoni T, Poldrack RA, Nichols TE, Van Essen DC, Wager TD. Large-scale automated synthesis of human functional neuroimaging data. *Nat Methods.* 2011;8(8):665-670.
54. Köster J, Rahmann S. Snakemake-a scalable bioinformatics workflow engine. *Bioinformatics.* 2018;34(20):3600.
55. Stüber C, Morawski M, Schäfer A, et al. Myelin and iron concentration in the human brain: a quantitative study of MRI contrast. *Neuroimage.* 2014;93 Pt 1:95-106.
56. Herron TJ, Kang X, Woods DL. Sex differences in cortical and subcortical human brain anatomy. *F1000Res.* 2015;4(88):88.
57. Magistretti PJ, Pellerin L, Rothman DL, Shulman RG. Energy on demand. *Science.* 1999;283(5401):496-497.
58. Krebs HA, Johnson WA. Metabolism of ketonic acids in animal tissues. *Biochem J.* 1937;31(4):645-660.
59. Russell O, Turnbull D. Mitochondrial DNA disease-molecular insights and potential routes to a cure. *Exp Cell Res.* 2014;325(1):38-43.
60. El-Hattab AW, Adesina AM, Jones J, Scaglia F. MELAS syndrome: Clinical manifestations, pathogenesis, and treatment options. *Mol Genet Metab.* 2015;116(1-2):4-12.
61. Sasarman F, Antonicka H, Shoubridge EA. The A3243G tRNA<sup>Leu</sup>(UUR) MELAS mutation causes amino acid misincorporation and a combined respiratory chain assembly defect partially suppressed by overexpression of EFTu and EFG2. *Hum Mol Genet.* 2008;17(23):3697-3707.
62. Klein Gunnewiek TM, Van Hugte EJH, Frega M, et al. m.3243A > G-Induced Mitochondrial Dysfunction Impairs Human Neuronal Development and Reduces Neuronal Network Activity and Synchronicity. *Cell Rep.* 2020;31(3):107538.
63. Tsuyama T, Tsubouchi A, Usui T, Imamura H, Uemura T. Mitochondrial dysfunction induces dendritic loss via eIF2 $\alpha$  phosphorylation. *J Cell Biol.* 2017;216(3):815-834.
64. Quintana A, Kruse SE, Kapur RP, Sanz E, Palmiter RD. Complex I deficiency due to loss of Ndufs4 in the brain results in progressive encephalopathy resembling Leigh syndrome. *Proc Natl Acad Sci U S A.* 2010;107(24):10996-11001.
65. Aryaman J, Johnston IG, Jones NS. Mitochondrial DNA density homeostasis accounts for a threshold effect in a hybrid model of a human mitochondrial disease. *Biochem J.* 2017;474(23):4019-4034.

66. Rossignol R, Faustin B, Rocher C, Malgat M, Mazat J-P, Letellier T. Mitochondrial threshold effects. *Biochem J*. 2003;370(Pt 3):751-762.
67. Kirino Y, Yasukawa T, Ohta S, et al. Codon-specific translational defect caused by a wobble modification deficiency in mutant tRNA from a human mitochondrial disease. *Proc Natl Acad Sci U S A*. 2004;101(42):15070-15075.
68. de Laat P, Koene S, van den Heuvel LPWJ, Rodenburg RJT, Janssen MCH, Smeitink JAM. Clinical features and heteroplasmy in blood, urine and saliva in 34 Dutch families carrying the m.3243A > G mutation. *J Inherit Metab Dis*. 2012;35(6):1059-1069.
69. Apps R, Hawkes R. Cerebellar cortical organization: a one-map hypothesis. *Nat Rev Neurosci*. 2009;10(9):670-681.
70. Apps R, Garwicz M. Anatomical and physiological foundations of cerebellar information processing. *Nat Rev Neurosci*. 2005;6(4):297-311.
71. Brochu G, Maler L, Hawkes R. Zebrin II: a polypeptide antigen expressed selectively by Purkinje cells reveals compartments in rat and fish cerebellum. *J Comp Neurol*. 1990;291(4):538-552.
72. Ahn AH, Dziennis S, Hawkes R, Herrup K. The cloning of zebrin II reveals its identity with aldolase C. *Development*. 1994;120(8):2081-2090.
73. Arakaki TL, Pezza JA, Cronin MA, et al. Structure of human brain fructose 1,6-(bis)phosphate aldolase: linking isozyme structure with function. *Protein Sci*. 2004;13(12):3077-3084.
74. Gallo G. The bioenergetics of neuronal morphogenesis and regeneration: Frontiers beyond the mitochondrion. *Dev Neurobiol*. 2020;80(7-8):263-276.
75. Kelly RM, Strick PL. Cerebellar loops with motor cortex and prefrontal cortex of a nonhuman primate. *J Neurosci*. 2003;23(23):8432-8444.
76. Ramnani N. Frontal lobe and posterior parietal contributions to the cortico-cerebellar system. *Cerebellum*. 2012;11(2):366-383.
77. Biswal B, Yetkin FZ, Haughton VM, Hyde JS. Functional connectivity in the motor cortex of resting human brain using echo-planar MRI. *Magn Reson Med*. 1995;34(4):537-541.
78. Buckner RL, Krienen FM, Castellanos A, Diaz JC, Yeo BTT. The organization of the human cerebellum estimated by intrinsic functional connectivity. *J Neurophysiol*. 2011;106(5):2322-2345.
79. Sokolov AA, Miall RC, Ivry RB. The Cerebellum: Adaptive Prediction for Movement and Cognition. *Trends Cogn Sci*. 2017;21(5):313-332.
80. Menon V. Large-scale brain networks and psychopathology: a unifying triple network model. *Trends Cogn Sci*. 2011;15(10):483-506.
81. Marek S, Siegel JS, Gordon EM, et al. Spatial and Temporal Organization of the Individual Human Cerebellum. *Neuron*. 2018;100(4):977-993.e7.
82. Schmahmann JD. Disorders of the cerebellum: ataxia, dysmetria of thought, and the cerebellar cognitive affective syndrome. *J Neuropsychiatry Clin Neurosci*. 2004;16(3):367-378.
83. Schmahmann JD, Sherman JC. The cerebellar cognitive affective syndrome. *Brain*. 1998;121 ( Pt 4):561-579.
84. Moore HL, Kelly T, Bright A, et al. Cognitive deficits in adult m.3243A>G- and m.8344A>G-related mitochondrial disease: importance of correcting for baseline intellectual ability. *Ann Clin Transl Neurol*. 2019;6(5):826-836.

85. Bundesen C, Habekost T, Kyllingsbaek S. A neural theory of visual attention: bridging cognition and neurophysiology. *Psychol Rev.* 2005;112(2):291-328.
86. Küchenhoff S, Sorg C, Schneider S, et al. Visual processing speed is linked to functional connectivity between right frontoparietal and visual networks. *Eur J Neurosci.* Published online March 25, 2021. doi:10.1111/ejn.15206
87. Wang R, Lin J, Sun C, et al. Topological reorganization of brain functional networks in patients with mitochondrial encephalomyopathy with lactic acidosis and stroke-like episodes. *Neuroimage Clin.* 2020;28:102480.
88. Desmond JE, Gabrieli JD, Glover GH. Dissociation of frontal and cerebellar activity in a cognitive task: evidence for a distinction between selection and search. *Neuroimage.* 1998;7(4 Pt 1):368-376.
89. Stuss DT, Floden D, Alexander MP, Levine B, Katz D. Stroop performance in focal lesion patients: dissociation of processes and frontal lobe lesion location. *Neuropsychologia.* 2001;39(8):771-786.
90. Pujol J, Vendrell P, Deus J, et al. The effect of medial frontal and posterior parietal demyelinating lesions on stroop interference. *Neuroimage.* 2001;13(1):68-75.
91. Usui N, Haji T, Maruyama M, et al. Cortical areas related to performance of WAIS Digit Symbol Test: a functional imaging study. *Neurosci Lett.* 2009;463(1):1-5.
92. Hickok G, Poeppel D. Dorsal and ventral streams: a framework for understanding aspects of the functional anatomy of language. *Cognition.* 2004;92(1-2):67-99.

## Supplementary material

Supplementary Table 1 Data acquisition parameters

|                                                                          | $T_1$           |                | rs-fMRI <sup>a</sup> |
|--------------------------------------------------------------------------|-----------------|----------------|----------------------|
|                                                                          | 3D MP2RAGE      | 3D Sa2RAGE     | 2D MB-EPI            |
| <i>TR (ms)</i>                                                           | 5000            | 2400           | 1.4                  |
| <i>TE (ms)</i>                                                           | 2.47            | 0.78           | 18.8                 |
| <i>TI<sub>1</sub>/TI<sub>2</sub> (TD<sub>1</sub>/TD<sub>2</sub>, ms)</i> | 900/2750        | 58/1800        | -                    |
| <i>Flip angle(s)(°)</i>                                                  | 5/3             | 4/10           | 80                   |
| <i>Partial Fourier</i>                                                   | 6/8             | 6/8            | 6/8                  |
| <i>Phase-encoding</i>                                                    | A-P             | A-P            | A-P                  |
| <i>GRAPPA<sup>b</sup></i>                                                | 3               | 2              | 3                    |
| <i>Reference lines</i>                                                   | 24              | 24             | 54                   |
| <i>Number of slices (/vols.)</i>                                         | 240 sagittal    | 88 sagittal    | 80 (/300)            |
| <i>Field of view (mm)</i>                                                | 224 × 224       | 256 × 256      | 198 × 198            |
| <i>Matrix size (mm)</i>                                                  | 320 × 320 × 240 | 128 × 128 × 96 | 142 × 142 × 112      |
| <i>Acquisition time (m:s)</i>                                            | 8:02            | 2:16           | 10:20                |

<sup>a</sup>Five reverse phase-encoded rs-fMRI volumes were acquired in order to correct for readout-related geometrical distortion. Except for the phase encoding direction (P-A) and number of vols (5), all acquisition parameters were identical. <sup>b</sup>GRAPPA was applied in the phase-encoding direction.

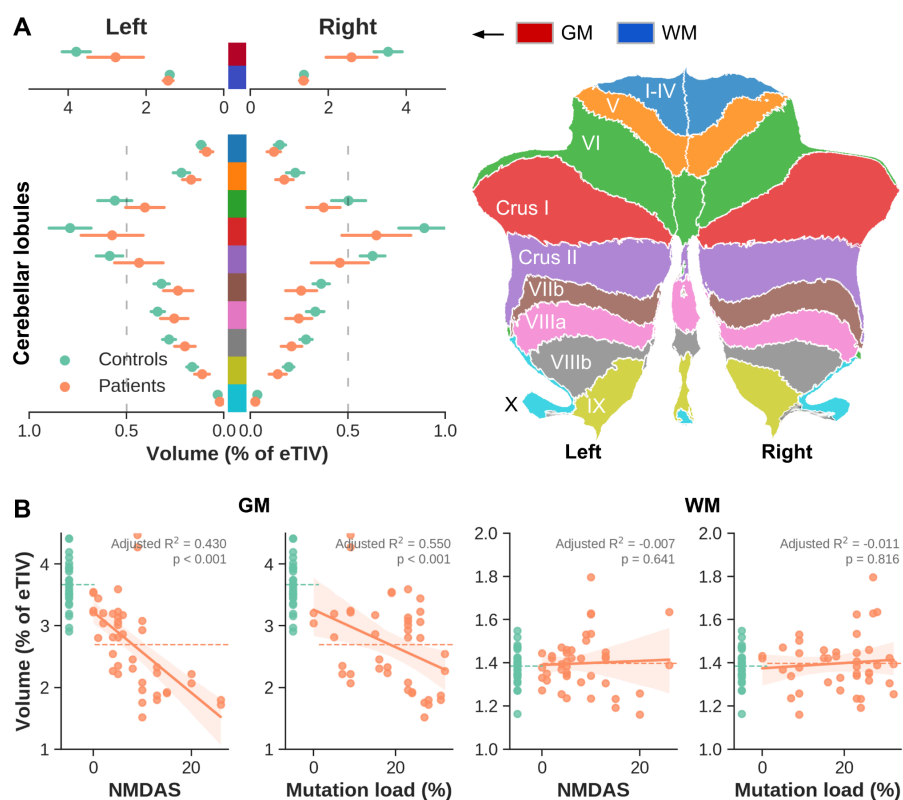

**Supplementary Figure 1 Cerebellar GM and WM volumes. (A)** Comparison of volume (presented as % of eTIV on the x-axis) between controls (green) and m.3243A>G patients (orange) for left and right hemisphere GM and WM (top), as well as per cerebellar lobule GM (bottom), color-coded based on the right panel legend. **(B)** First two columns: correlation between GM volume (y-axis) and NMDAS or mutation load (x-axes). Last two columns: similar to first two columns but using WM volume (y-axis).

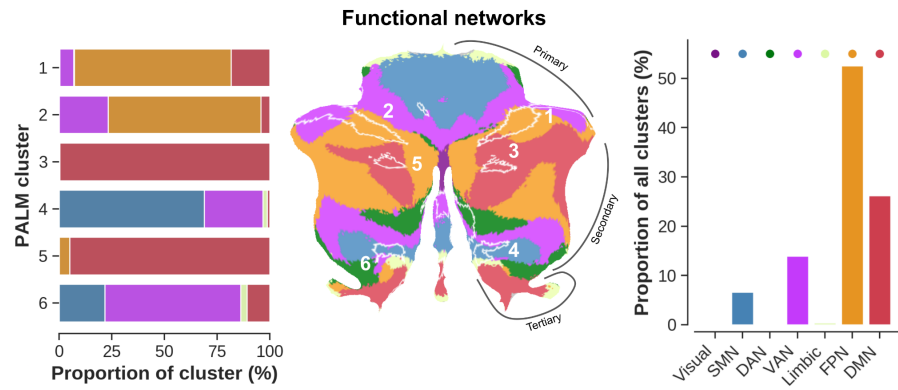

**Supplementary Figure 2 Spatial distribution of the significant clusters with respect to the cerebellar functional networks.** Left to right: stacked bar plot showing statistical (i.e., PALM) clusters (y-axis), ordered from largest at the top (cluster one) to smallest at the bottom (cluster six, in voxels, top x-axis). Here, the width of each individually-colored bar represents the proportional overlap (bottom x-axis) with the respective network. For example, cluster three overlaps entirely with DMN. Middle panel shows a flatmap representation to visualize the localization of each cluster across the cerebellar GM with respect to its lobules. Right panel shows the proportional overlap (y-axis) across all clusters per lobule (x-axis). For example, 50 % of significant voxels fall within FPN.



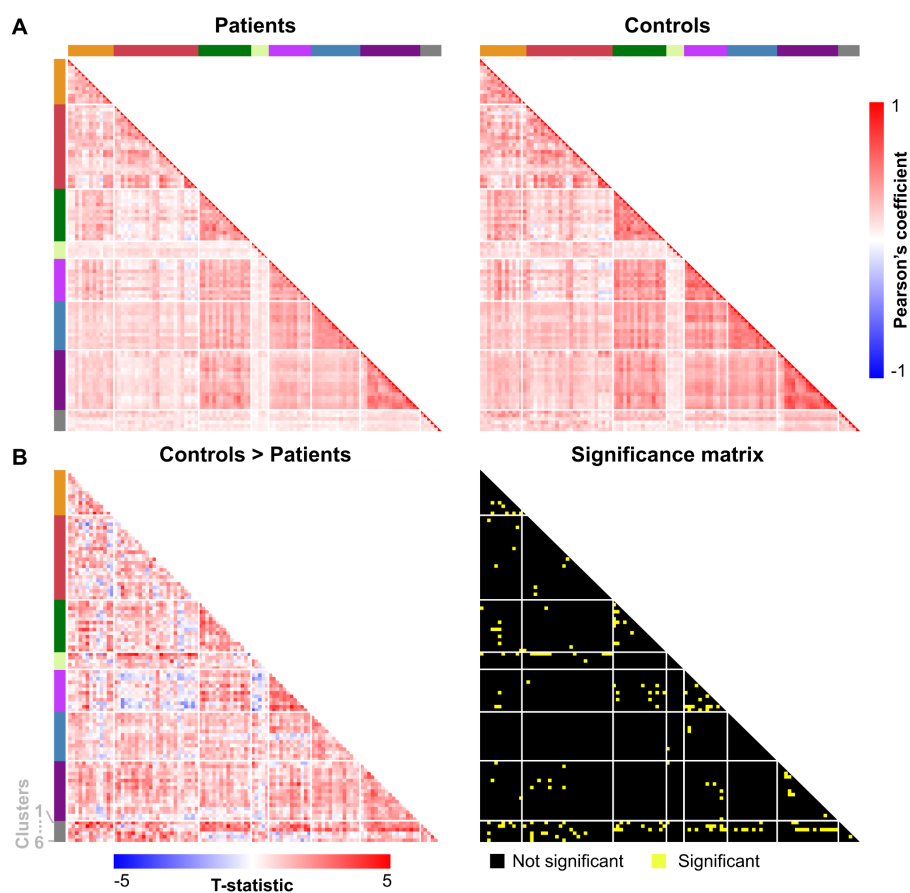

**Supplementary Figure 3 Functional connectivity matrices.** (A) Average Pearson's coefficient connectivity matrices across m.3243A>G patients (left) and controls (right). Each row and column represents a cortical ROI, organized based on functional brain network (top and left colored bars), appended by the statistical clusters in gray. (B) Resulting T-statistic (left) and binary significance matrices (right).

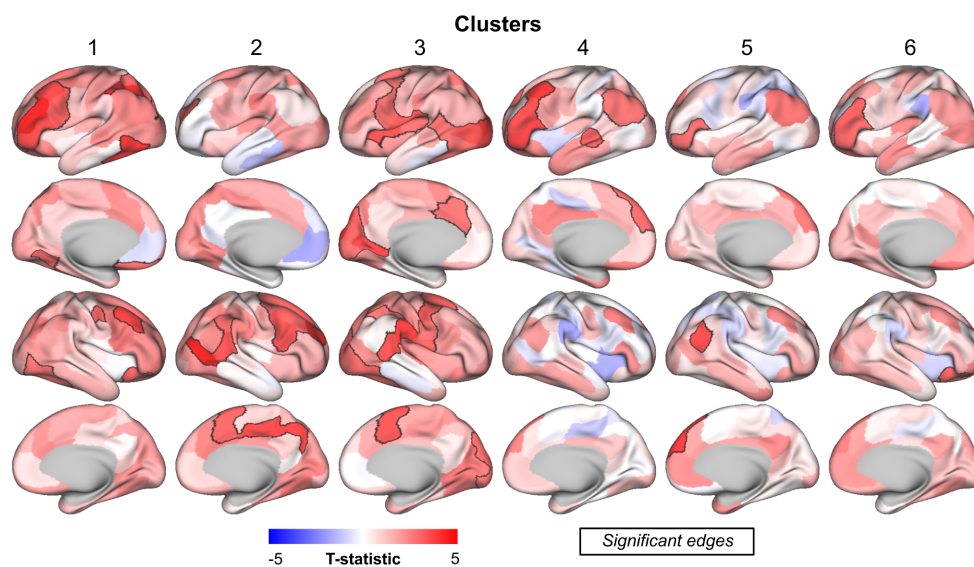

**Supplementary Figure 4 Cluster-wise visualization of functional connectivity changes.** Changes in functional connectivity between each cerebellar clusters (columns) and cortical ROIs, color-coded for corresponding T-statistic. Edges between clusters and ROIs characterized by significantly reduced connectivity in m.3243A>G patients are delineated using a solid black border.

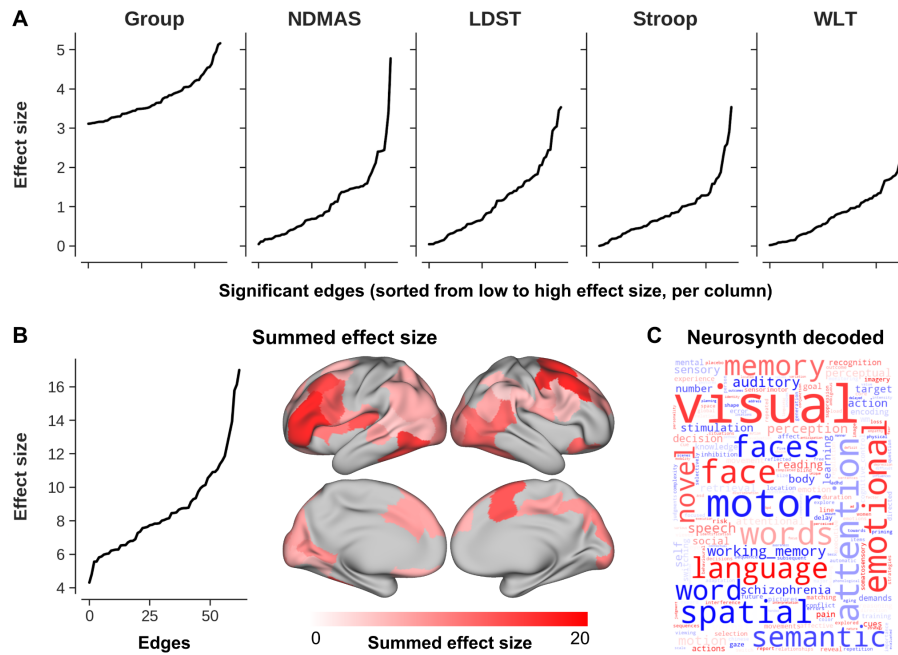

**Supplementary Figure 5 Comparison of effect sizes.** (A) Left to right: line plots with edgewise effect sizes extracted from the comparison between controls and m.3243A>G patients (Fig. 4), and as function of disease severity using NDMAS (Fig. 6) and cognitive performance using LDST, Stroop and WLT (Fig. 7), ordered from smallest to largest maximum T-statistic. (B) Line plot with edgewise effect sizes summed across data in A and ordered from smallest to largest, as well as displayed onto the cortical surface. (C) Word cloud based on the comparison between the cortical surface map in B and the NeuroSynth database.
